# Supplementary material for: Association of Cost Sharing With Delayed and Complicated Presentation of Acute Appendicitis or Diverticulitis
Source: PubMed Central journal article supplement (PMC8796960; doi:10.1001/jamahealthforum.2021.2324), 2021-09-03
Supplement: jamahealthforum-e212324-s001.pdf [file jamahealthforum-e212324-s001.pdf]

## Supplementary Online Content

Loehrer AP, Leech MM, Weiss JE, et al. Association of cost sharing with delayed and complicated presentation of acute appendicitis or diverticulitis. *JAMA Health Forum*. 2021;2(9):e212324. doi:10.1001/jamahealthforum.2021.2324

**eTable 1.** *ICD-9* and *ICD-10* Diagnosis Codes Used for Inclusion in Study

**eTable 2.** *ICD-9* and *ICD-10* Diagnosis and Procedure Codes for Early Uncomplicated Presentation, Optimal Surgical Care and Minimally Invasive Surgery

**eTable 3.** Total Cost Sharing by Patient Characteristics Among 151 852 Patients (2013-2017)

This supplementary material has been provided by the authors to give readers additional information about their work.

**eTable 1. ICD-9 and ICD-10 Diagnosis Codes Used for Inclusion in Study**

| <b>Diagnosis</b>     | <b>ICD-9 Diagnosis Codes</b>   | <b>ICD-10 Diagnosis Codes</b>                                                                  |
|----------------------|--------------------------------|------------------------------------------------------------------------------------------------|
| Acute Appendicitis   | 540.0, 540.1, 540.9, 541, 542  | K35.2, K35.20, K35.21, K35.3, K35.30, K35.31, K35.32, K35.33, K35.8, K35.80, K35.891, K36, K37 |
| Acute Diverticulitis | 562.10, 562.11, 562.12, 562.13 | K57.2, K57.20, K57.21, K57.3, K57.30, K57.31, K57.32, K57.33                                   |

Abbreviations: ICD-9 International Classification of Diseases, 9<sup>th</sup> Edition. ICD-10 International Classification of Diseases, 10<sup>th</sup> Edition

**eTable 2. ICD-9 and ICD-10 Diagnosis and Procedure Codes for Early Uncomplicated Presentation, Optimal Surgical Care and Minimally Invasive Surgery**

| Early Uncomplicated Presentation                                                                                                                                                                                                                                                                                                  | Optimal Surgical Care                                                                                                                                                                                                                                                                                                                                                                                                                                                                                                                                                                                                                                                               | Minimally Invasive Surgery*                                                                                                                            |
|-----------------------------------------------------------------------------------------------------------------------------------------------------------------------------------------------------------------------------------------------------------------------------------------------------------------------------------|-------------------------------------------------------------------------------------------------------------------------------------------------------------------------------------------------------------------------------------------------------------------------------------------------------------------------------------------------------------------------------------------------------------------------------------------------------------------------------------------------------------------------------------------------------------------------------------------------------------------------------------------------------------------------------------|--------------------------------------------------------------------------------------------------------------------------------------------------------|
| Absence of Diagnosis Codes                                                                                                                                                                                                                                                                                                        | <sup>1</sup> Presence of Procedure Codes<br><sup>2</sup> Absence of Procedure Codes                                                                                                                                                                                                                                                                                                                                                                                                                                                                                                                                                                                                 | <sup>a</sup> Open vs <sup>b</sup> Laparoscopic Surgical Procedure Codes                                                                                |
| <b><sup>1</sup>Acute Appendicitis</b>                                                                                                                                                                                                                                                                                             |                                                                                                                                                                                                                                                                                                                                                                                                                                                                                                                                                                                                                                                                                     |                                                                                                                                                        |
| 540.0, 540.1,<br>567.22, 567.29,<br>567.31, 567.38,<br>569.5,<br>785.50, 785.52, 995.91, 995.92<br><br>K35.2, K35.20,<br>K35.21, K35.32, K35.33,<br>K63.2, K63.20, K65.0, K65.1,<br>K68.12, K68.19,<br>R65.2, R65.20, R65.21, A41.4,<br>A41.50, A41.51, A41.52,<br>A41.53, A41.59, A41.81, A41.89<br>A41.9, R57.9, R65.20, R65.21 | 47.09, 47.01<br><br>0DTJ0ZZ, 0DTJ4ZZ                                                                                                                                                                                                                                                                                                                                                                                                                                                                                                                                                                                                                                                | <b>a:</b> 47.09,<br>0DTJ0ZZ<br><br><b>b:</b> 47.01,<br>0DTJ4ZZ                                                                                         |
| <b><sup>2</sup>Acute Diverticulitis</b>                                                                                                                                                                                                                                                                                           |                                                                                                                                                                                                                                                                                                                                                                                                                                                                                                                                                                                                                                                                                     |                                                                                                                                                        |
| 567.31, 567.22,<br>567.29, 567.38, 567.39,<br>569.5, 569.81, 569.83,<br>785.50, 785.52, 995.91, 995.92<br><br>K57.20, K57.21,<br>K63.2, K65.1, K68.12, K68.19,<br>N32.1, N32.2, N82.3, N82.4                                                                                                                                      | 46.01, 46.03, 46.10, 46.11, 46.13, 46.14,<br>46.20, 46.21, 46.22, 46.23, 46.24<br><br>0DSB0ZZ, 0DSB4ZZ, 0DSB7ZZ,<br>0DSB8ZZ, 0DSBXZZ, 0D1B0Z4,<br>0D1B4Z4, 0D1B8Z4<br>0DSH0ZZ, 0DSK0ZZ, 0DSL0ZZ,<br>0DSM0ZZ, 0DSN0ZZ, 0DSP0ZZ,<br>0DSQ0ZZ, 0DSH4ZZ, 0DSK4ZZ,<br>0DSL4ZZ, 0DSM4ZZ, 0DSN4ZZ,<br>0DSP4ZZ, 0DSQ4ZZ, 0DSH7ZZ,<br>0DSK7ZZ, 0DSL7ZZ, 0DSM7ZZ,<br>0DSN7ZZ, 0DSP7ZZ, 0DSQ7ZZ,<br>0DSH8ZZ, 0DSK8ZZ, 0DSL8ZZ,<br>0DSM8ZZ, 0DSN8ZZ, 0DSP8ZZ,<br>0DSQ8ZZ, 0DSHXZZ, 0DSKXZZ,<br>0DSLXZZ, 0DSMXZZ, 0DSNXZZ,<br>0DSPXZZ, 0DSQXZZ, 0D1H0Z4,<br>0D1K0Z4, 0D1L0Z4, 0D1M0Z4, 0D1N0Z4,<br>0D1H4Z4, 0D1K4Z4, 0D1L4Z4, 0D1M4Z4,<br>0D1N4Z4, 0D1H8Z4, 0D1K8Z4, 0D1L8Z4,<br>0D1M8Z4, 0D1N8Z4 | <b>a:</b> 45.75, 45.76, 45.79,<br>0DTM0ZZ, 0DTN0ZZ,<br>0DBM0ZZ, 0DBN0ZZ<br><br><b>b:</b> 17.35, 17.36, 17.39,<br>0DTM4ZZ, 0DTN4ZZ,<br>0DBM4ZZ, 0DBN4ZZ |

Abbreviations: ICD-9 International Classification of Diseases, 9<sup>th</sup> Edition. ICD-10 International Classification of Diseases, 10<sup>th</sup> Edition

\*Among those with an appendectomy or colectomy

**eTable 3.** Total Cost Sharing by Patient Characteristics Among 151 852 Patients (2013-2017)

| Characteristic <sup>1</sup>                     | Total<br>N = 151,852<br>N (Col %) | Total Cost Sharing Quartiles      |                                       |                                         |                                 |
|-------------------------------------------------|-----------------------------------|-----------------------------------|---------------------------------------|-----------------------------------------|---------------------------------|
|                                                 |                                   | Q1<br>(\$0 - \$502)<br>N = 37,957 | Q2<br>(\$502 - \$1,725)<br>N = 37,981 | Q3<br>(\$1,726 - \$3,082)<br>N = 37,954 | Q4<br>(> \$3,082)<br>N = 37,960 |
|                                                 |                                   | N (Row %)                         |                                       |                                         |                                 |
| <b>Diagnosis</b>                                |                                   |                                   |                                       |                                         |                                 |
| Acute Appendicitis                              | 65,424 (43.1)                     | 14,240 (21.8)                     | 14,929 (22.8)                         | 17,040 (26.0)                           | 19,215 (29.4)                   |
| Acute Diverticulitis                            | 86,428 (56.9)                     | 23,717 (27.4)                     | 23,052 (26.7)                         | 20,914 (24.2)                           | 18,745 (21.7)                   |
| <b>Age Group (years)</b>                        |                                   |                                   |                                       |                                         |                                 |
| 18 – 24                                         | 11,281 (7.4)                      | 2,757 (24.4)                      | 2,601 (23.1)                          | 2,850 (25.3)                            | 3,073 (27.2)                    |
| 25 – 34                                         | 18,459 (2.2)                      | 3,778 (20.5)                      | 4,228 (22.9)                          | 5,019 (27.2)                            | 5,343 (29.4)                    |
| 35 – 44                                         | 27,637 (18.2)                     | 6,054 (21.9)                      | 6,938 (25.1)                          | 7,227 (26.1)                            | 7,418 (26.8)                    |
| 45 – 54                                         | 43,770 (28.8)                     | 10,873 (24.8)                     | 11,079 (25.3)                         | 11,059 (25.3)                           | 10,759 (24.6)                   |
| 55 - 64                                         | 50,705 (33.4)                     | 14,495 (28.6)                     | 13,135 (25.9)                         | 11,799 (23.3)                           | 11,276 (22.2)                   |
| <b>Gender</b>                                   |                                   |                                   |                                       |                                         |                                 |
| Male                                            | 79,517 (52.4)                     | 18,643 (23.4)                     | 19,288 (24.3)                         | 20,330 (25.6)                           | 21,256 (26.7)                   |
| Female                                          | 72,335 (47.6)                     | 19,314 (26.7)                     | 18,693 (25.8)                         | 17,624 (24.4)                           | 16,704 (23.1)                   |
| <b>Calendar Year</b>                            |                                   |                                   |                                       |                                         |                                 |
| 2013                                            | 35,407 (23.3)                     | 8,905 (25.1)                      | 9,899 (28.0)                          | 9,185 (25.9)                            | 7,418 (20.9)                    |
| 2014                                            | 30,414 (20.0)                     | 7,344 (24.1)                      | 8,120 (26.7)                          | 7,891 (25.9)                            | 7,059 (23.2)                    |
| 2015                                            | 28,542 (18.8)                     | 6,980 (24.5)                      | 7,126 (25.0)                          | 7,201 (25.2)                            | 7,235 (25.3)                    |
| 2016                                            | 30,204 (19.9)                     | 7,769 (25.7)                      | 7,081 (23.4)                          | 7,013 (23.2)                            | 8,341 (27.6)                    |
| 2017                                            | 27,285 (18.0)                     | 6,959 (25.5)                      | 5,755 (21.1)                          | 6,664 (24.4)                            | 7,907 (29.0)                    |
| <b>Calendar Quarter</b>                         |                                   |                                   |                                       |                                         |                                 |
| Jan-Mar                                         | 36,585 (24.1)                     | 6,802 (18.6)                      | 8,752 (23.9)                          | 10,288 (28.1)                           | 10,743 (29.4)                   |
| Apr-Jun                                         | 39,471 (26.0)                     | 9,336 (23.6)                      | 10,077 (25.5)                         | 9,978 (25.3)                            | 10,080 (25.5)                   |
| Jul-Sep                                         | 39,056 (25.7)                     | 10,338 (26.5)                     | 10,026 (25.7)                         | 9,525 (24.4)                            | 9,167 (23.5)                    |
| Oct-Dec                                         | 36,740 (24.2)                     | 11,481 (31.2)                     | 9,126 (24.8)                          | 8,163 (22.2)                            | 7,970 (21.7)                    |
| <b>Elixhauser Comorbidity Index<sup>2</sup></b> |                                   |                                   |                                       |                                         |                                 |
| 0                                               | 22,549 (41.3)                     | 5,018 (22.2)                      | 4,914 (21.8)                          | 5,589 (24.8)                            | 7,028 (31.2)                    |
| 1                                               | 15,311 (28.1)                     | 3,931 (25.7)                      | 3,556 (23.2)                          | 3,681 (24.0)                            | 4,143 (27.1)                    |
| 2                                               | 9,230 (16.9)                      | 2,656 (28.8)                      | 2,185 (23.7)                          | 2,127 (23.0)                            | 2,262 (24.5)                    |
| 3+                                              | 7,498 (13.7)                      | 2,818 (37.6)                      | 1,635 (21.8)                          | 1,494 (19.9)                            | 1,551 (20.7)                    |
| <b>Social Deprivation Index Quartiles</b>       |                                   |                                   |                                       |                                         |                                 |

|                                           |                |               |               |               |               |
|-------------------------------------------|----------------|---------------|---------------|---------------|---------------|
| Q1 (1 - 25)                               | 49,536 (33.7)  | 12,515 (25.3) | 12,914 (26.1) | 12,340 (24.9) | 11,767 (23.7) |
| Q2 (26 - 50)                              | 38,850 (26.5)  | 9,504 (24.5)  | 9,840 (25.3)  | 9,726 (25.0)  | 9,780 (25.2)  |
| Q3 (51 - 75)                              | 32,226 (22.0)  | 7,482 (23.2)  | 7,944 (24.6)  | 8,359 (25.9)  | 8,441 (26.2)  |
| Q4 (76 - 100)                             | 26,181 (17.8)  | 6,350 (24.2)  | 6,263 (23.9)  | 6,542 (25.0)  | 7,026 (26.8)  |
| <b>Rural</b>                              |                |               |               |               |               |
| Urban                                     | 134,341 (91.5) | 32,901 (24.5) | 33,727 (25.1) | 33,780 (25.1) | 33,933 (25.3) |
| Rural                                     | 12,458 (8.5)   | 2,956 (23.7)  | 3,236 (26.0)  | 3,185 (25.6)  | 3,081 (24.7)  |
| <b>Census Bureau Geographic Divisions</b> |                |               |               |               |               |
| New England                               | 5,489 (3.7)    | 1,654 (30.1)  | 1,473 (26.8)  | 1,313 (23.9)  | 1,049 (19.1)  |
| Middle Atlantic                           | 21,886 (14.9)  | 7,966 (36.4)  | 5,683 (26.0)  | 4,533 (20.7)  | 3,704 (16.9)  |
| East North Central                        | 20,556 (14.0)  | 5,217 (25.4)  | 5,328 (25.9)  | 5,041 (24.5)  | 4,970 (24.2)  |
| West North Central                        | 9,264 (6.3)    | 2,344 (25.3)  | 2,277 (24.6)  | 2,391 (25.8)  | 2,252 (24.3)  |
| South Atlantic                            | 34,614 (23.6)  | 8,047 (23.3)  | 8,816 (25.5)  | 8,421 (24.3)  | 9,330 (26.9)  |
| East South Central                        | 7,069 (4.8)    | 1,470 (20.8)  | 1,946 (27.5)  | 1,870 (26.4)  | 1,783 (25.2)  |
| West South Central                        | 26,302 (17.9)  | 4,397 (16.7)  | 6,242 (23.7)  | 7,754 (29.5)  | 7,909 (30.1)  |
| Mountain                                  | 9,546 (6.5)    | 1,967 (20.6)  | 2,144 (22.5)  | 2,429 (25.4)  | 3,006 (31.5)  |
| Pacific                                   | 12,065 (8.2)   | 2,788 (23.1)  | 3,052 (25.3)  | 3,214 (26.6)  | 3,011 (25.0)  |
| <b>High Deductible Plan</b>               |                |               |               |               |               |
| No                                        | 113,186 (74.9) | 30,782 (27.2) | 30,569 (27.0) | 28,157 (24.9) | 23,678 (20.9) |
| Yes                                       | 37,959 (25.1)  | 6,938 (18.3)  | 7,302 (19.2)  | 9,594 (26.3)  | 14,125 (37.2) |
| <b>Benefit Plan Type</b>                  |                |               |               |               |               |
| Point of Service                          | 104,737 (69.0) | 22,808 (21.8) | 27,256 (26.0) | 29,218 (27.9) | 25,455 (24.3) |
| Preferred Provider Organization           | 17,804 (11.7)  | 4,724 (26.5)  | 4,112 (23.1)  | 3,627 (20.4)  | 5,341 (30.0)  |
| Health Maintenance Organization           | 19,200 (12.6)  | 6,820 (35.5)  | 4,255 (22.2)  | 3,227 (16.8)  | 4,898 (25.5)  |
| Exclusive Provider Organization           | 8,926 (5.9)    | 3,022 (33.9)  | 2,154 (24.1)  | 1,735 (19.4)  | 2,015 (22.6)  |
| Other <sup>3</sup>                        | 1,185 (0.8)    | 583 (49.2)    | 204 (17.2)    | 147 (12.4)    | 251 (21.2)    |

<sup>1</sup>Missing (N): SDI (5,059); Rurality (5,053); Census Bureau Geographic Divisions (5,061); High Deductible Plan (707)

<sup>2</sup>Study cohort (36.0%) for ECI (N = 54,588); Study time period: 10/2015-2017

<sup>3</sup>Other includes Indemnity, Short Term and Other
